# Supplementary material
Source: PubMed Central journal article supplement (PMC6483268)

Web TABLE 1. Determination of Risk of Bias of Studies Included in Meta-analysis 2006-2011

Web TABLE 2. Allele Frequencies for rs9332739, Estimated Pooled Prevalence, and Odds Ratio of Minor Alleles, by Ethnicity, of Studies Included in the Meta-Analysis

Web TABLE 3. Allele Frequencies for rs547154, Estimated Pooled Prevalence, and Odds Ratio of Minor Alleles, by Ethnicity, of Studies Included in the Meta-Analysis

Web TABLE 4. Allele Frequencies for rs4151667, Estimated Pooled Prevalence, and Odds Ratio of Minor Alleles, by Ethnicity, of Studies Included in the Meta-Analysis

Web TABLE 5. Allele Frequencies for rs641153, Estimated Pooled Prevalence, and Odds Ratio of Minor Alleles, by Ethnicity, of Studies Included in the Meta-Analysis

Web TABLE 1. Determination of Risk of Bias of Studies Included in Meta-analysis 2006-2011<sup>a</sup>

| Author, year<br>(Reference no.) | Bias in<br>ascertainment<br>of cases | Bias in<br>ascertainment<br>of controls | Bias in<br>genotyping<br>controls | Population<br>stratification | Confounding<br>bias | Selective<br>outcome<br>reports | HWE |
|---------------------------------|--------------------------------------|-----------------------------------------|-----------------------------------|------------------------------|---------------------|---------------------------------|-----|
| Maller, 2006 (13)               | No                                   | No                                      | No                                | No                           | No                  | No                              | Yes |
| Gold, 2006 (32)                 | No                                   | No                                      | Yes                               | No                           | No                  | Yes                             | No  |
| Spencer, 2007 (36)              | No                                   | No                                      | No                                | No                           | No                  | No                              | No  |
| Chu, 2008 (56)                  | No                                   | No                                      | Unclear                           | No                           | No                  | Yes                             | No  |
| Jakobsdottir, 2008<br>(33)      | No                                   | No                                      | No                                | No                           | No                  | No                              | No  |
| Scholl, 2008 (26)               | No                                   | No                                      | Yes                               | No                           | No                  | No                              | No  |
| Bergeron-Sawit, 2009<br>(15)    | No                                   | No                                      | No                                | No                           | No                  | No                              | No  |
| Farwick, 2009 (31)              | No                                   | No                                      | No                                | No                           | No                  | Yes                             | No  |
| Francis, 2009 (19)              | No                                   | No                                      | Yes                               | No                           | No                  | No                              | Yes |
| Goto, 2009 (20)                 | No                                   | No                                      | No                                | No                           | No                  | Yes                             | No  |
| Park, 2009 (22)                 | No                                   | No                                      | No                                | No                           | No                  | No                              | No  |
| Pei, 2009 (23)                  | No                                   | No                                      | Yes                               | No                           | No                  | No                              | No  |
| Reynolds, 2009 (24)             | No                                   | No                                      | No                                | No                           | No                  | No                              | Yes |
| Richardson, 2009 (35)           | No                                   | No                                      | No                                | No                           | No                  | No                              | No  |
| Seddon, 2009 (27)               | No                                   | No                                      | Yes                               | No                           | No                  | Yes                             | Yes |
| McKay, 2009 (34)                | No                                   | No                                      | Unclear                           | No                           | No                  | Yes                             | No  |
| Kaur, 2010 (37)                 | No                                   | No                                      | No                                | No                           | Yes                 | No                              | No  |
| Liu, 2010 (55)                  | No                                   | No                                      | No                                | No                           | Yes                 | No                              | No  |
| Chen, 2011 (54)                 | No                                   | No                                      | Yes                               | No                           | No                  | Yes                             | Yes |

Abbreviations: AMD, age-related macular degeneration; HWE, Hardy-Weinberg equilibrium

<sup>a</sup>Each domain rates the risk of bias. Answers of “no” indicate low risk and “yes” indicate high risk of bias; “Unclear“ means an assessment was not possible with the information given.

Web TABLE 2. Allele Frequencies for rs9332739, Estimated Pooled Prevalence, and Odds Ratio of Minor Alleles, by Ethnicity, of Studies Included in the Meta-Analysis

| Author, year<br>(Reference no.) | AMD           |                   |                      | Control group |                   |                      | 95% CI |      |      |      |
|---------------------------------|---------------|-------------------|----------------------|---------------|-------------------|----------------------|--------|------|------|------|
|                                 | No. C alleles | Allele prevalence | No. of total alleles | No. C alleles | Allele prevalence | No. of total alleles | HWE    | OR   | LL   | UL   |
| Caucasian                       |               |                   |                      |               |                   |                      |        |      |      |      |
| Maller, 2006 (13)               | 64            | 0.026             | 2476                 | 101           | 0.054             | 1920                 | 0.748  | 0.48 | 0.35 | 0.66 |
| Gold, 2006 (32)                 | 36            | 0.020             | 1756                 | 42            | 0.055             | 762                  | 1.000  | 0.35 | 0.22 | 0.55 |
| Spencer, 2007 (36)              | 42            | 0.03              | 1396                 | 28            | 0.05              | 564                  | 0.532  | 0.59 | 0.36 | 0.97 |
| Jakobsdottir, 2008 (33)         | 10            | 0.027             | 364                  | 11            | 0.033             | 332                  | 0.157  | 0.82 | 0.35 | 1.97 |
| Scholl, 2008 (26)               | 7             | 0.031             | 224                  | 5             | 0.037             | 134                  | 1.000  | 0.83 | 0.26 | 2.68 |
| Bergeron-Sawit, 2009 (15)       | 17            | 0.020             | 842                  | 22            | 0.042             | 520                  | 1.000  | 0.47 | 0.25 | 0.89 |
| Farwick, 2009 (31)              | 39            | 0.025             | 1569                 | 7             | 0.034             | 204                  | 1.000  | 0.70 | 0.31 | 1.59 |
| Francis, 2009 (19) <sup>a</sup> | 37            | 0.26              | 1042                 | 39            | 0.048             | 816                  | 1.000  | 0.92 | 0.8  | 1.04 |
| Francis, 2009 (19) <sup>b</sup> | 6             | 0.008             | 796                  | 20            | 0.036             | 552                  | 1.000  | 0.2  | 0.08 | 0.51 |
| Park, 2009 (22)                 | 9             | 0.037             | 246                  | 10            | 0.034             | 296                  | 1.000  | 1.09 | 0.43 | 2.72 |
| Reynolds, 2009 (24)             | 8             | 0.038             | 208                  | 9             | 0.079             | 114                  | 1.000  | 0.47 | 0.17 | 1.24 |
| Richardson, 2009 (35)           | 23            | 0.022             | 1034                 | 11            | 0.035             | 314                  | 1.000  | 0.63 | 0.3  | 1.30 |
| Seddon, 2009 (27)               | 8             | 0.014             | 558                  | 94            | 0.040             | 2334                 | 0.711  | 0.40 | 0.20 | 0.78 |
| McKay, 2009 (34)                | 31            | 0.036             | 850                  | 45            | 0.053             | 856                  | 0.620  | 0.68 | 0.43 | 1.09 |
| Chen, 2011 (54)                 | 80            | 0.030             | 2670                 | 50            | 0.049             | 1018                 | 1.000  | 0.85 | 0.74 | 0.97 |
| Pooled                          | 417           | 0.025             | 16108                | 494           | 0.048             | 10736                |        | 0.55 | 0.46 | 0.65 |
| Asian                           |               |                   |                      |               |                   |                      |        |      |      |      |
| Kaur, 2010 (37)                 | 339           | 0.958             | 354                  | 328           | 0.937             | 350                  | 0.505  | 1.52 | 0.77 | 2.97 |
| Liu, 2010 (55)                  | 10            | 0.021             | 466                  | 10            | 0.023             | 430                  | 0.538  | 0.92 | 0.38 | 2.34 |
| Pooled                          | 349           | 0.485             | 820                  | 338           | 0.480             | 780                  |        | 1.26 | 0.74 | 2.16 |

Abbreviations: CI, confidence interval; HWE, Hardy-Weinberg equilibrium; LL, lower limit; OR, odds ratio; UL, upper limit

<sup>a</sup> Age-related Eye Disease Study

<sup>b</sup> Casey Eye Institute Macular Degeneration Center

Web TABLE 3. Allele Frequencies for rs547154, Estimated Pooled Prevalence, and Odds Ratio of Minor Alleles, by Ethnicity, of Studies Included in the Meta-Analysis

| Author, year (Reference no.)    | AMD          |            |                      | Control      |            |                     | HWE    | OR     | 95%CI |      |
|---------------------------------|--------------|------------|----------------------|--------------|------------|---------------------|--------|--------|-------|------|
|                                 | No. T allele | Prevalence | No. of total alleles | No. T allele | Prevalence | No. of total allele |        | T vs G | LL    | UL   |
| Caucasian                       |              |            |                      |              |            |                     |        |        |       |      |
| Maller, 2006 (13)               | 134          | 0.054      | 2476                 |              |            |                     | 0.854  |        |       |      |
| Gold, 2006 (32)                 | 90           | 0.05       | 1788                 | 84           | 0.111      | 764                 | 0.798  | 0.42   | 0.31  | 0.58 |
| Spencer, 2007 (36)              | 70           | 0.05       | 1396                 | 63           | 0.112      | 564                 | 0.762  | 0.42   | 0.29  | 0.60 |
| Jakobsdottir, 2008(33)          | 9            | 0.025      | 358                  | 31           | 0.096      | 322                 | 0.364  | 0.24   | 0.11  | 0.52 |
| Scholl, 2008 (26)               | 6            | 0.027      | 224                  | 10           | 0.075      | 134                 | 1.000  | 0.34   | 0.12  | 0.96 |
| Bergeron-Sawit, 2009 (15)       | 42           | 0.05       | 842                  | 39           | 0.091      | 430                 | 0.229  | 0.53   | 0.34  | 0.83 |
| Farwick, 2009 (31)              | 60           | 0.045      | 1338                 | 5            | 0.028      | 176                 | 1.000  | 1.61   | 0.64  | 4.05 |
| Francis, 2009 (19) <sup>a</sup> | 14           | 0.035      | 396                  | 139          | 0.227      | 612                 | <0.001 | 0.13   | 0.07  | 0.22 |
| Park, 2009 (22)                 | 33           | 0.043      | 772                  | 28           | 0.088      | 320                 | 1.000  | 0.64   | 0.33  | 1.24 |
| Richardson, 2009 (35)           | 58           | 0.055      | 1050                 | 47           | 0.117      | 400                 | 0.739  | 0.44   | 0.29  | 0.66 |
| Pooled                          | 502          | 0.046      | 10244                | 488          | 0.090      | 5058                |        | 0.47   | 0.37  | 0.60 |
| Asian                           |              |            |                      |              |            |                     |        |        |       |      |
| Goto, 2009 (20)                 | 11           | 0.056      | 196                  | 36           | 0.095      | 380                 | 0.068  | 0.57   | 0.28  | 1.14 |
| Kaur, 2010 (37)                 | 30           | 0.085      | 354                  | 96           | 0.274      | 350                 | 0.568  | 0.25   | 0.16  | 0.38 |
| Liu, 2010 (55)                  | 32           | 0.063      | 476                  | 36           | 0.082      | 440                 | 0.642  | 0.76   | 0.46  | 1.25 |
| Pooled                          | 73           | 0.070      | 1026                 | 168          | 0.148      | 1170                |        | 0.48   | 0.22  | 1.05 |

Abbreviations: CI, confidence interval; HWE, Hardy-Weinberg equilibrium; LL, lower limit; OR, odds ratio; UL, upper limit

<sup>a</sup>Not included in pooling because of departure from HWE

Web TABLE 4. Allele Frequencies for rs4151667, Estimated Pooled Prevalence, and Odds Ratio of Minor Alleles, by Ethnicity, of Studies Included in the Meta-Analysis

| Author, year<br>(Reference no.) | AMD          |            |                     | Non-AMD      |            | No. of total allele | HWE   | OR<br>(A vs T) | 95% CI |       |
|---------------------------------|--------------|------------|---------------------|--------------|------------|---------------------|-------|----------------|--------|-------|
|                                 | No. A allele | prevalence | No. of total allele | No. A allele | prevalence |                     |       |                | LL     | UL    |
| Caucasian                       |              |            |                     |              |            |                     |       |                |        |       |
| Maller, 2006 (13)               | 72           | 0.029      | 2476                | 93           | 0.050      | 1868                | 1.000 | 0.584          | 0.427  | 0.799 |
| Gold, 2006 (32)                 | 36           | 0.02       | 1806                | 42           | 0.055      | 766                 | 1.000 | 0.351          | 0.223  | 0.552 |
| Jakobsdottir, 2008 (33)         | 10           | 0.028      | 356                 | 12           | 0.036      | 334                 | 0.185 | 0.776          | 0.331  | 1.82  |
| Scholl, 2008 (26)               | 7            | 0.031      | 224                 | 5            | 0.037      | 134                 | 1.000 | 0.832          | 0.259  | 2.677 |
| Bergeron-Sawit, 2009 (15)       | 17           | 0.02       | 842                 | 22           | 0.051      | 430                 | 1.000 | 0.382          | 0.201  | 0.728 |
| Farwick, 2009 (31)              | 39           | 0.024      | 1604                | 7            | 0.034      | 204                 | 1.000 | 0.701          | 0.309  | 1.589 |
| Francis, 2009 (19)              | 6            | 0.015      | 394                 | 11           | 0.034      | 322                 | 1.000 | 0.437          | 0.16   | 1.195 |
| Park, 2009 (22)                 | 19           | 0.025      | 772                 | 15           | 0.047      | 320                 | 1.000 | 0.513          | 0.257  | 1.023 |
| Richardson, 2009 (35)           | 23           | 0.022      | 1040                | 12           | 0.036      | 336                 | 1.000 | 0.611          | 0.3    | 1.241 |
| McKay, G. J., 2009 (34)         | 29           | 0.034      | 850                 | 45           | 0.053      | 856                 | 0.620 | 0.637          | 0.395  | 1.025 |
| Pooled                          | 258          | 0.024      | 10364               | 264          | 0.047      | 5609                |       | 0.535          | 0.447  | 0.641 |
| Pei, 2009 (23)                  | 5            | 0.02       | 246                 | 8            | 0.031      | 260                 | 1.000 | 0.654          | 0.211  | 2.026 |
| Kaur, 2010 (37)                 | 14           | 0.04       | 354                 | 22           | 0.063      | 350                 | 0.505 | 0.614          | 0.309  | 1.22  |
| Liu, 2010 (55)                  | 8            | 0.017      | 476                 | 7            | 0.016      | 440                 | 1.000 | 1.057          | 0.38   | 2.94  |
| Pooled                          | 27           | 0.024      | 1076                | 37           | 0.035      | 1050                | 0.060 | 0.711          | 0.428  | 1.184 |

Abbreviations: AMD, age-related macular degeneration; CI, confidence interval; OR, Odds ratio; LL, lower limit; UL, upper limit

Web TABLE 5. Allele Frequencies for rs641153, Estimated Pooled Prevalence, and Odds Ratio of Minor Alleles, by Ethnicity, of Studies Included in the Meta-Analysis

| Author, Year<br>(Reference no.) | AMD          |              |                     | Non-AMD      |              | No. of total allele | HWE   | OR<br>(A vs G) | 95% CI       |              |
|---------------------------------|--------------|--------------|---------------------|--------------|--------------|---------------------|-------|----------------|--------------|--------------|
|                                 | No. A allele | Prevalence   | No. of total allele | No. A allele | Prevalence   |                     |       |                | LL           | UL           |
| <b>Caucasian</b>                |              |              |                     |              |              |                     |       |                |              |              |
| Maller, 2006 (13)               | 111          | 0.045        | 2476                | 191          | 0.102        | 1868                | 0.859 | 0.438          | 0.344        | 0.558        |
| Gold, 2006 (32)                 | 55           | 0.05         | 1102                | 59           | 0.11         | 538                 | 1.000 | 0.426          | 0.291        | 0.625        |
| Spencer, 2007 (36)              | 70           | 0.05         | 1396                | 56           | 0.099        | 564                 | 0.744 | 0.479          | 0.332        | 0.691        |
| Scholl, 2008 (26)               | 6            | 0.027        | 224                 | 10           | 0.075        | 134                 | 1.000 | 0.341          | 0.121        | 0.962        |
| Farwick, 2009 (31)              | 26           | 0.017        | 1552                | 26           | 0.109        | 238                 | 0.356 | 0.139          | 0.079        | 0.244        |
| Reynolds, 2009 (24)             | 6            | 0.029        | 206                 | 11           | 0.096        | 114                 | 1.000 | 0.281          | 0.101        | 0.781        |
| Richardson, 2009 (35)           | 58           | 0.055        | 1058                | 47           | 0.118        | 398                 | 0.740 | 0.433          | 0.289        | 0.648        |
| Seddon, 2009 (27)               | 23           | 0.041        | 558                 | 150          | 0.064        | 2334                | 0.471 | 0.626          | 0.4          | 0.981        |
| McKay, 2009 (34)                | 39           | 0.046        | 850                 | 96           | 0.112        | 856                 | 1.000 | 0.381          | 0.259        | 0.56         |
| Chen, 2011 (54)                 | 135          | 0.051        | 2672                | 91           | 0.089        | 1018                | 1.000 | 0.542          | 0.411        | 0.715        |
| <b>Pooled</b>                   | <b>529</b>   | <b>0.041</b> | <b>12094</b>        | <b>737</b>   | <b>0.096</b> | <b>6194</b>         |       | <b>0.404</b>   | <b>0.313</b> | <b>0.521</b> |
| <b>Asian</b>                    |              |              |                     |              |              |                     |       |                |              |              |
| Chu, 2008 (56)                  | 32           | 0.111        | 288                 | 40           | 0.159        | 252                 | 0.514 | 0.663          | 0.402        | 1.091        |
| Pei, 2009 (23)                  | 18           | 0.073        | 246                 | 18           | 0.069        | 260                 | 1.000 | 1.061          | 0.539        | 2.091        |
| Kaur, 2010 (37)                 | 22           | 0.068        | 324                 | 73           | 0.231        | 316                 | 0.502 | 0.242          | 0.146        | 0.402        |
| Liu, 2010 (55)                  | 18           | 0.038        | 476                 | 27           | 0.061        | 440                 | 0.572 | 0.601          | 0.326        | 1.108        |
| <b>Pooled</b>                   | <b>72</b>    | <b>0.070</b> | <b>1088</b>         | <b>140</b>   | <b>0.128</b> | <b>1008</b>         |       | <b>0.554</b>   | <b>0.299</b> | <b>1.024</b> |

Abbreviations: CI, confidence interval; HWE, Hardy-Weinberg equilibrium; LL, lower limit; OR, odds ratio; UL, upper limit

Web FIGURE 1. Forest plots and funnel plots of genotype effects for rs9332739. Individual and pooled odds ratios were estimated for CC vs GG (part A), CG vs GG (part B). Funnel plots for CC vs GG (part C), and CG vs GG (part D). The pooled odds ratio indicated by the diamond. AREDS, age-related Eye Disease Study; CI, confidence interval (horizontal line); OR, odds ratio

Web FIGURE 2. Forest plots and funnel plots of genotype effects for rs547154. Individual and pooled odds ratio were estimated for TT vs GG (part A), GT vs GG (part B). Funnel plots for TT vs GG (part C), and GT vs GG (part D). The pooled odds ratio indicated by the diamond. CI, confidence interval (horizontal line); OR, odds ratio

Web FIGURE 3. Forest plots and funnel plots of genotype effects for rs4151667. Individual and pooled odds ratio were estimated for AA vs TT (part A), AT vs TT (part B). Funnel plots for AA vs TT (part C), and AT vs TT (part D). The pooled odds ratio indicated by the diamond. CI, confidence interval (horizontal line); OR, odds ratio

Web FIGURE 4. Forest plots and funnel plots of genotype effects for rs641153. Individual and pooled odds ratio were estimated for AA vs GG (part A), GA vs GG (part B). Funnel plots for AA vs GG (part C), and GA vs GG (part D). The pooled odds ratio indicated by the diamond. CI, confidence interval (horizontal line); OR, odds ratio

Web FIGURE 1. Forest plots and funnel plots of genotype effects for rs9332739. Individual and pooled odds ratios were estimated for CC vs GG (part A), CG vs GG (part B). Funnel plots for CC vs GG (part C), and CG vs GG (part D). The pooled odds ratio indicated by the diamond. AREDS, age-related Eye Disease Study; CI, confidence interval (horizontal line); OR, odds ratio.

A)

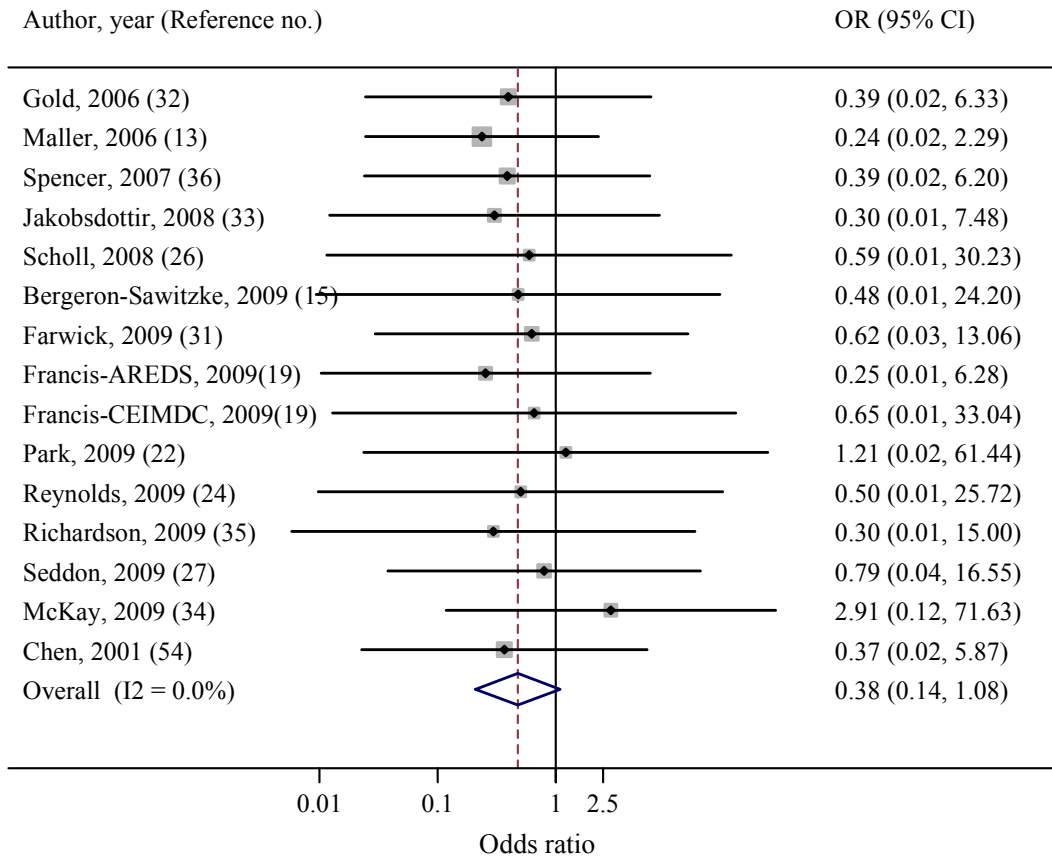



B)

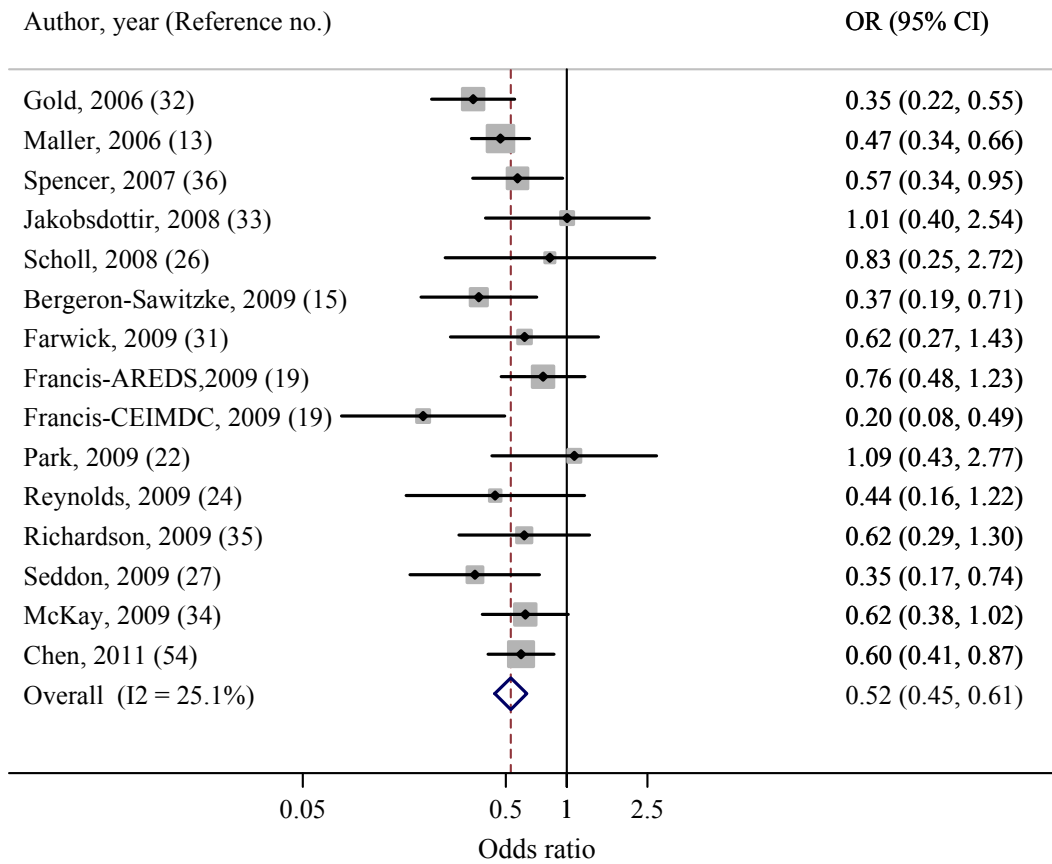

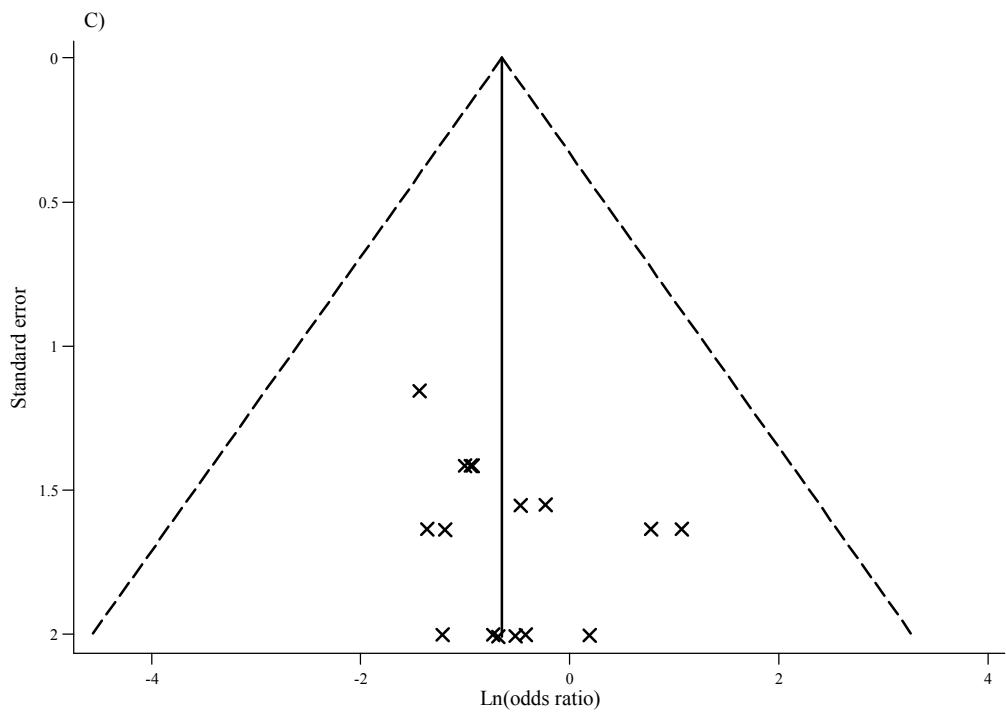

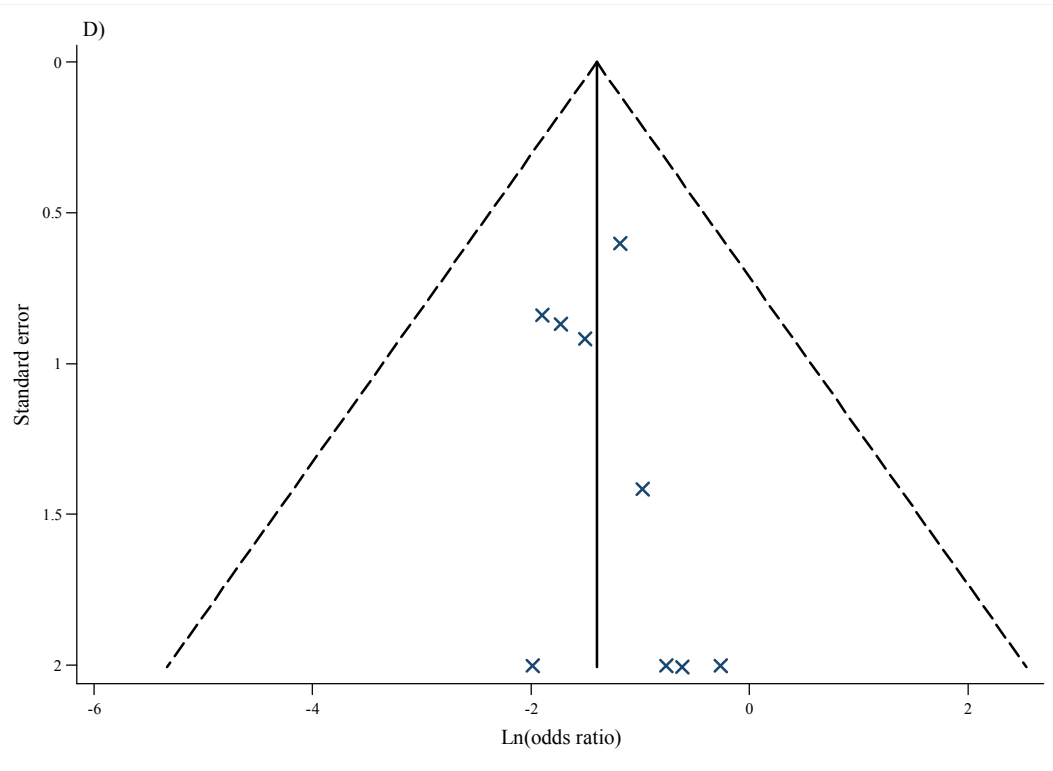

Web FIGURE 2. Forest plots and funnel plots of genotype effects for rs547154. Individual and pooled odds ratio were estimated for TT vs GG (part A), GT vs GG (part B). Funnel plots for TT vs GG (part C), and GT vs GG (part D). The pooled odds ratio indicated by the diamond. CI, confidence interval (horizontal line); OR, odds ratio

A)

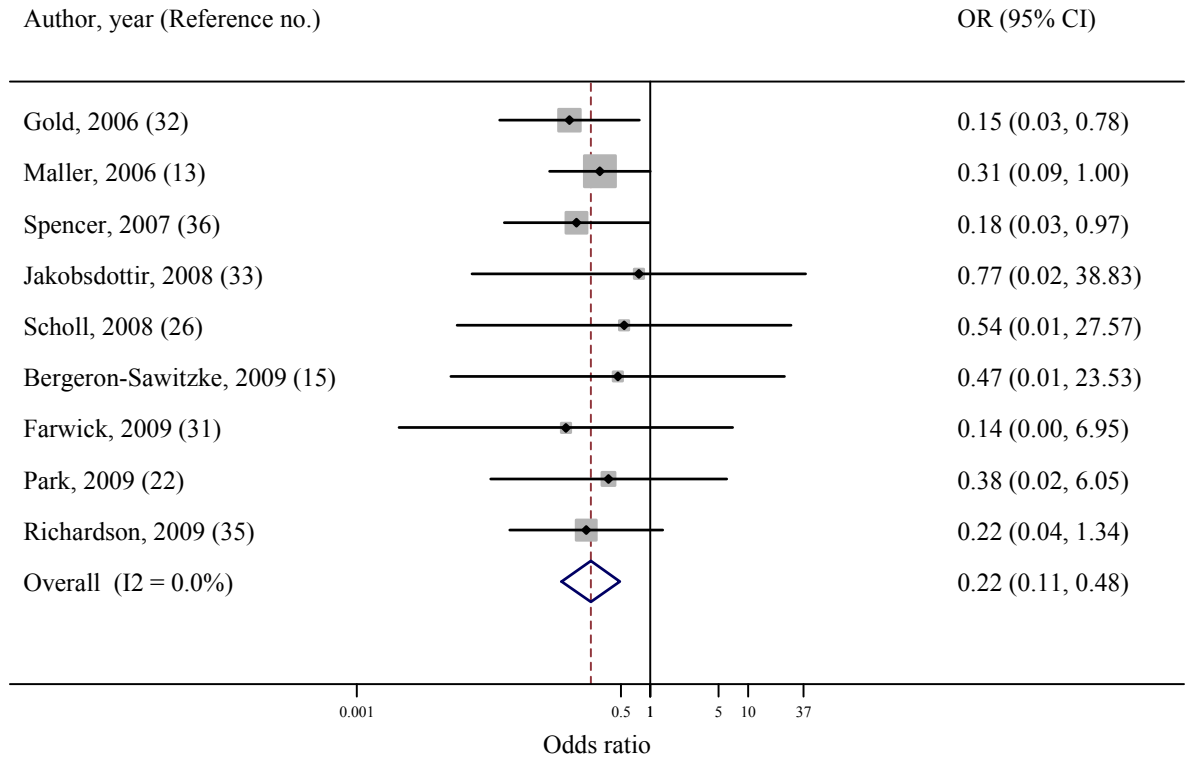

B)

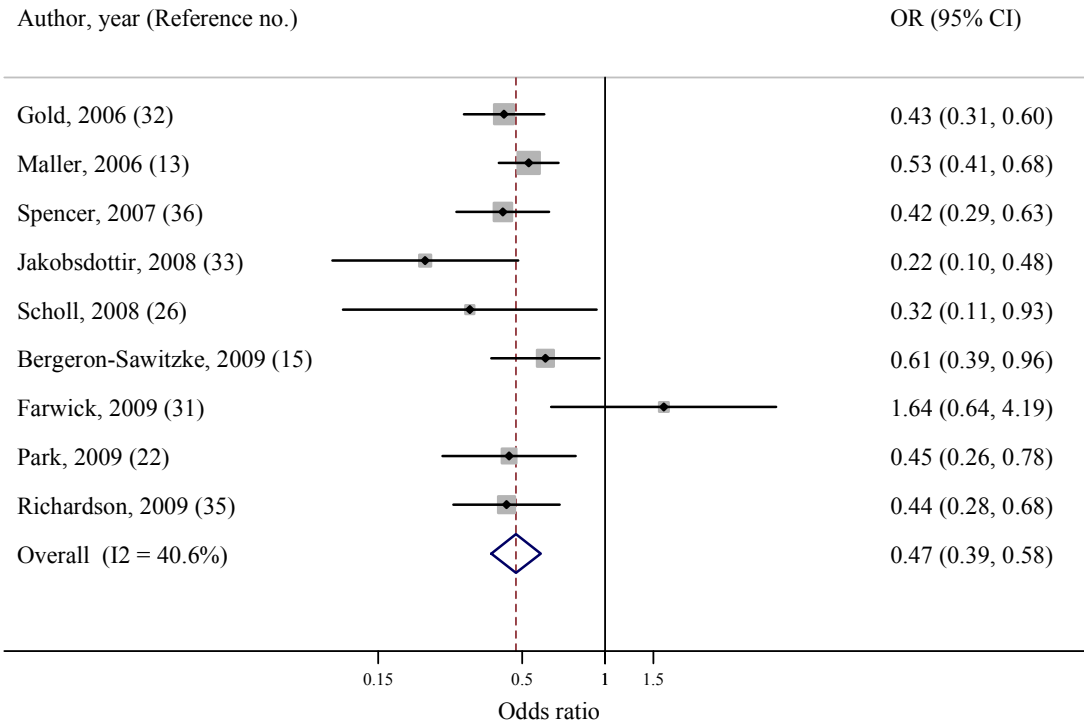

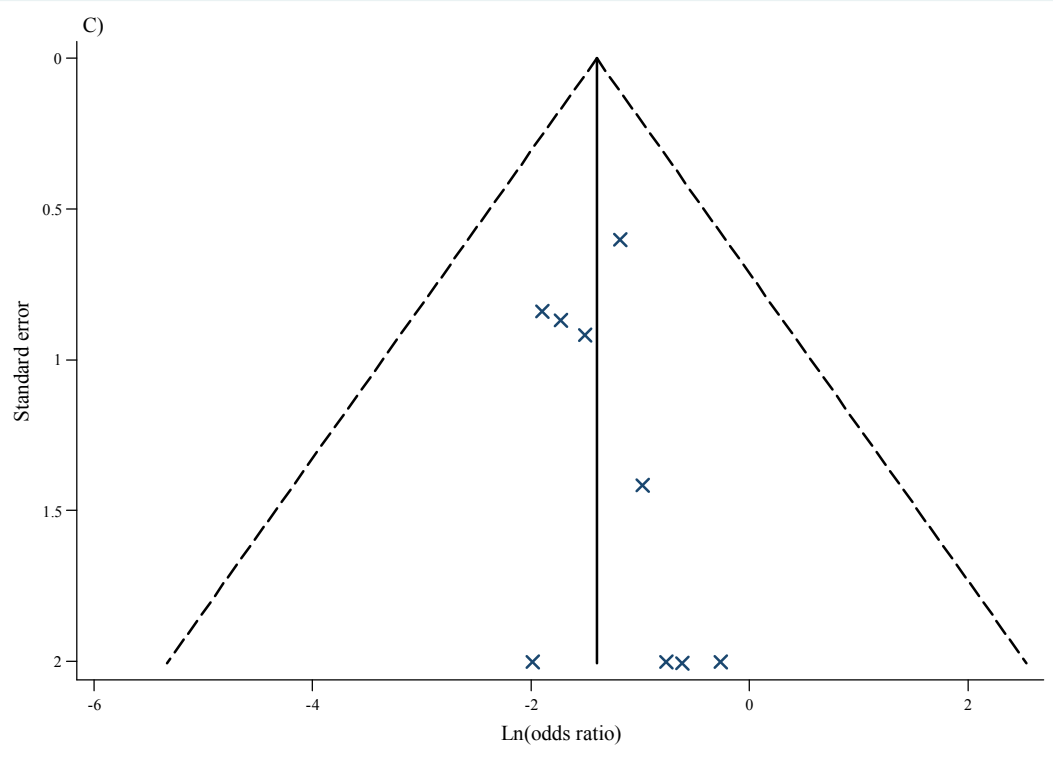

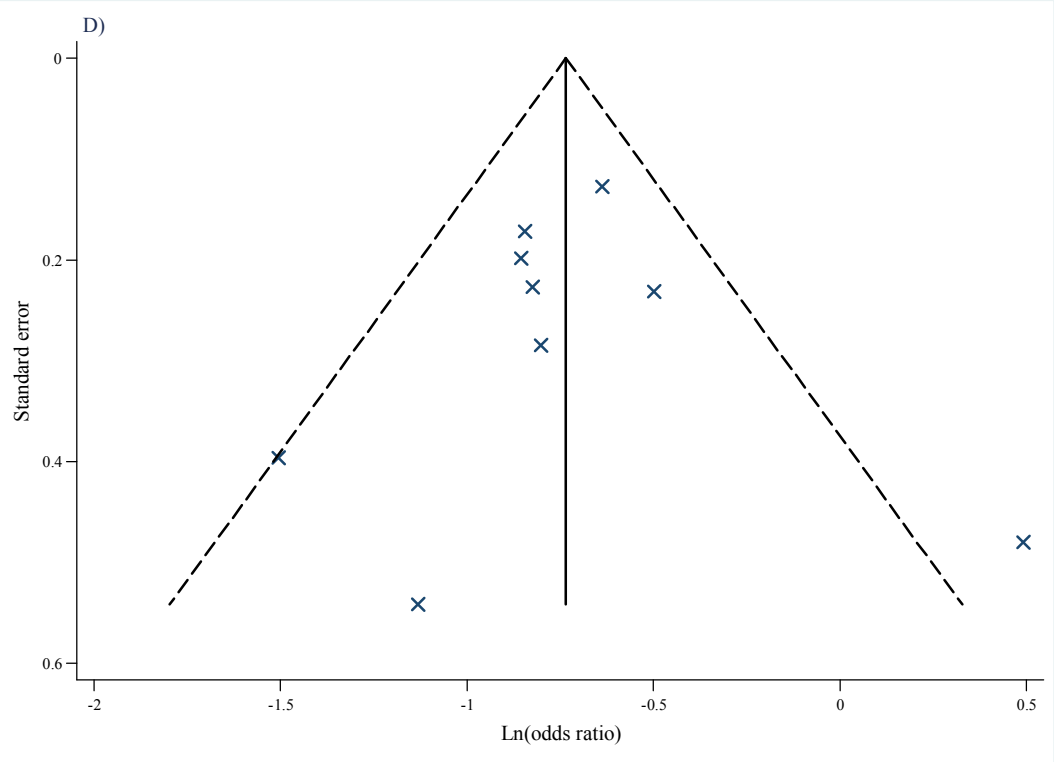

Web FIGURE 3. Forest plots and funnel plots of genotype effects for rs4151667. Individual and pooled odds ratio were estimated for AA vs TT (part A), AT vs TT (part B). Funnel plots for AA vs TT (part C), and AT vs TT (part D). The pooled odds ratio indicated by the diamond. CI, confidence interval (horizontal line); OR, odds ratio

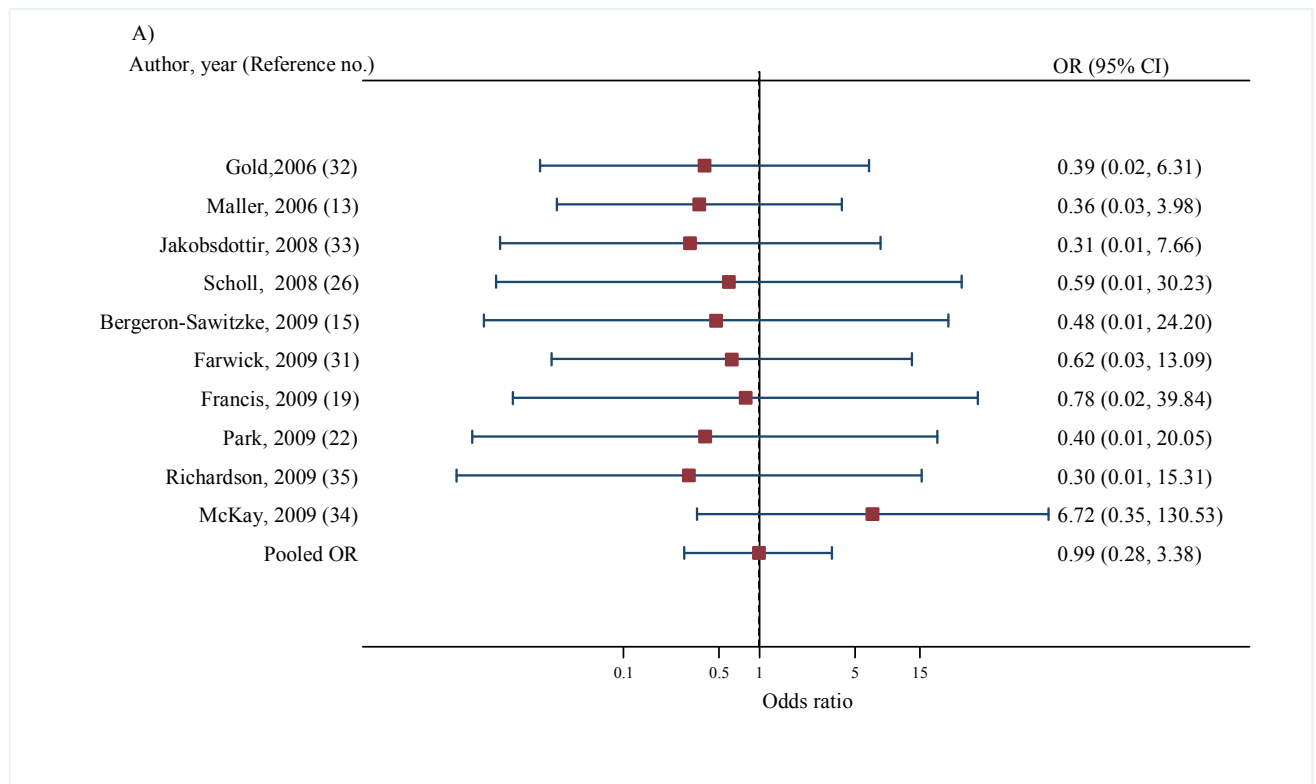



B)

Author, year (Reference no.)

OR (95% CI)

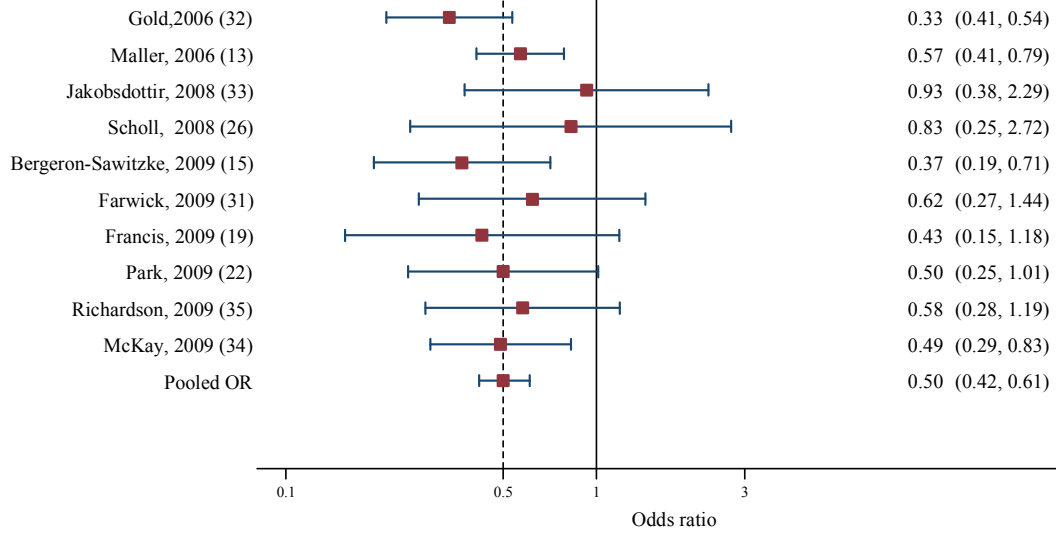

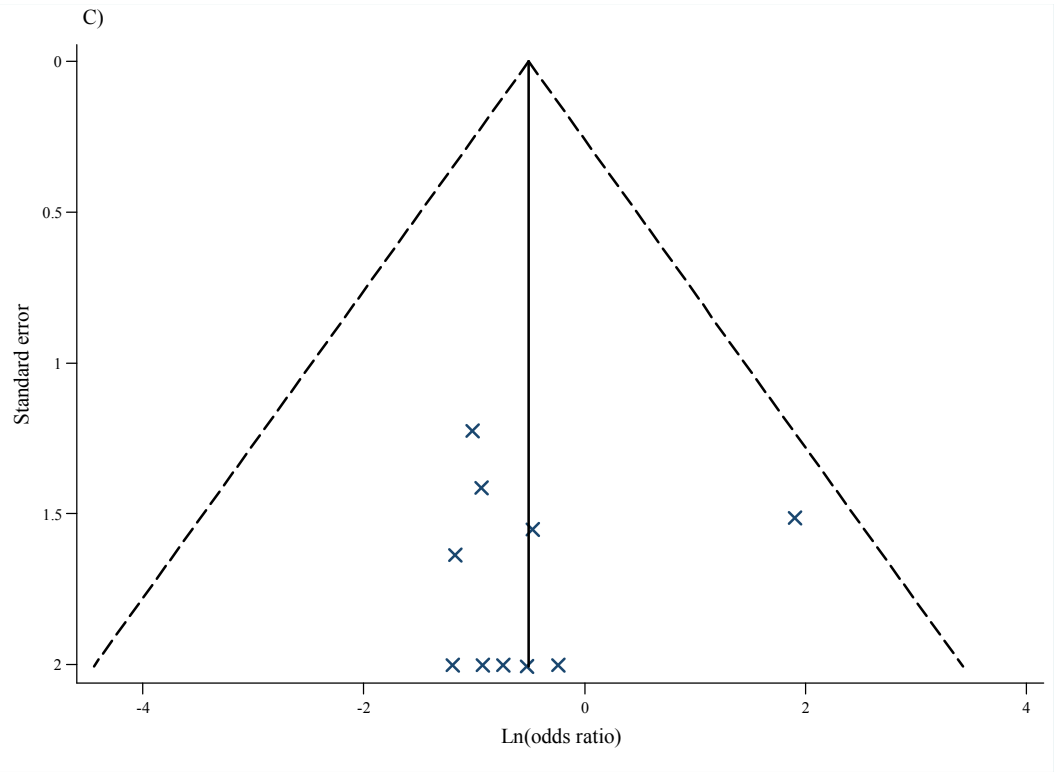

D)

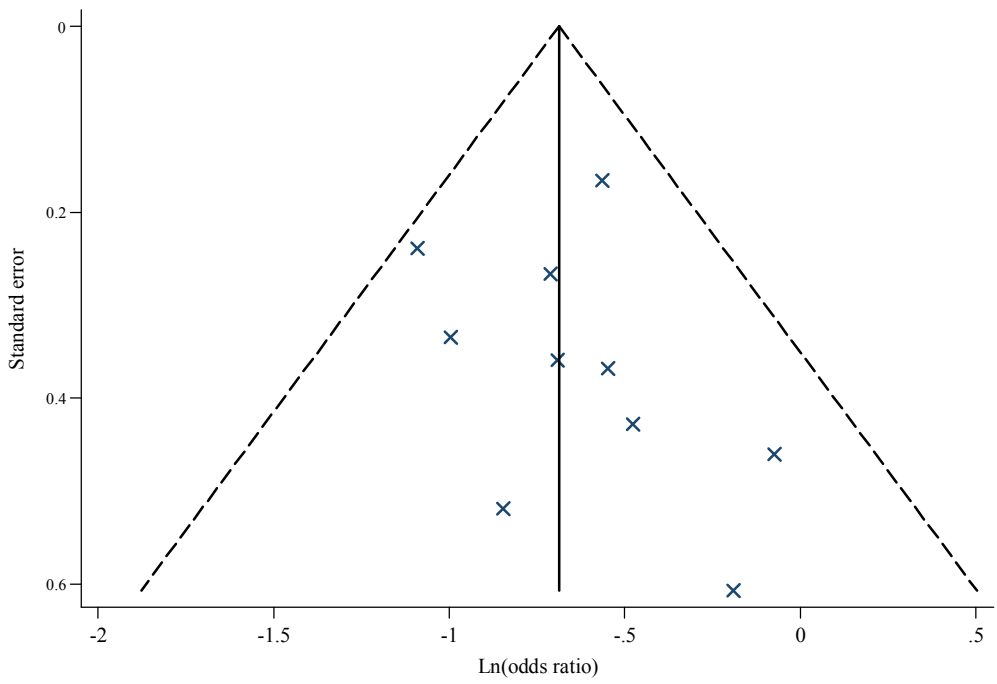

Web FIGURE 4. Forest plots and funnel plots of genotype effects for rs641153. Individual and pooled odds ratio were estimated for AA vs GG (part A), GA vs GG (part B). Funnel plots for AA vs GG (part C), and GA vs GG (part D). The pooled odds ratio indicated by the diamond. CI, confidence interval (horizontal line); OR, odds ratio

A)

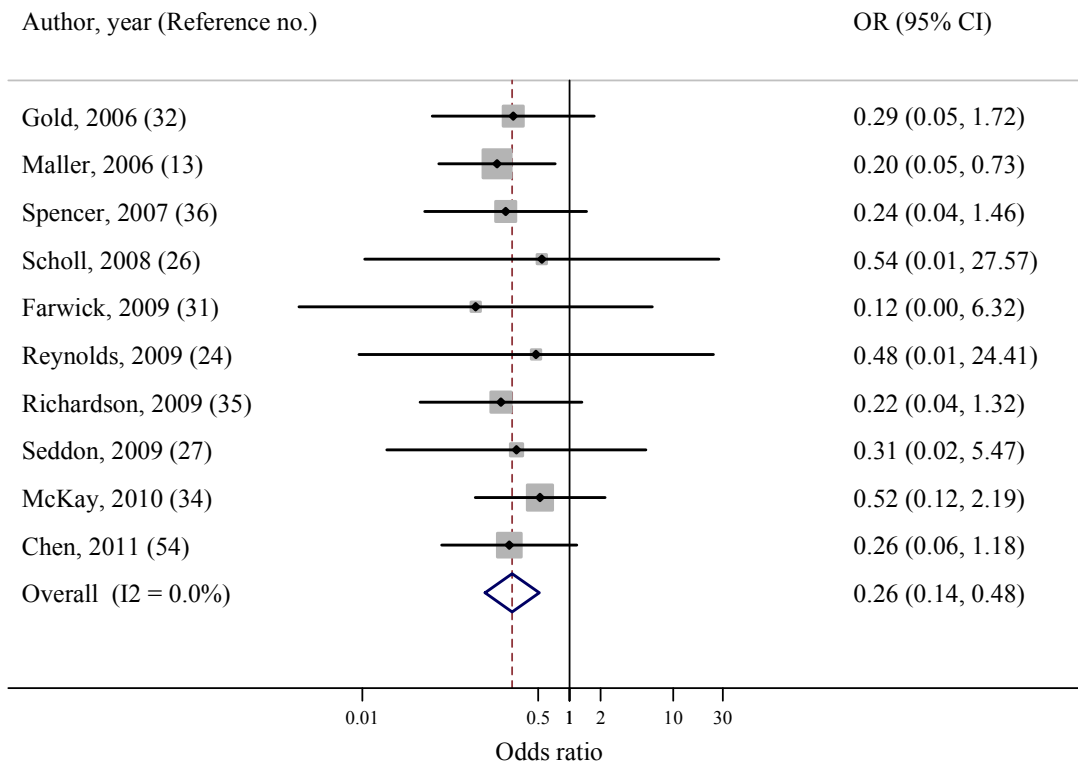

B)

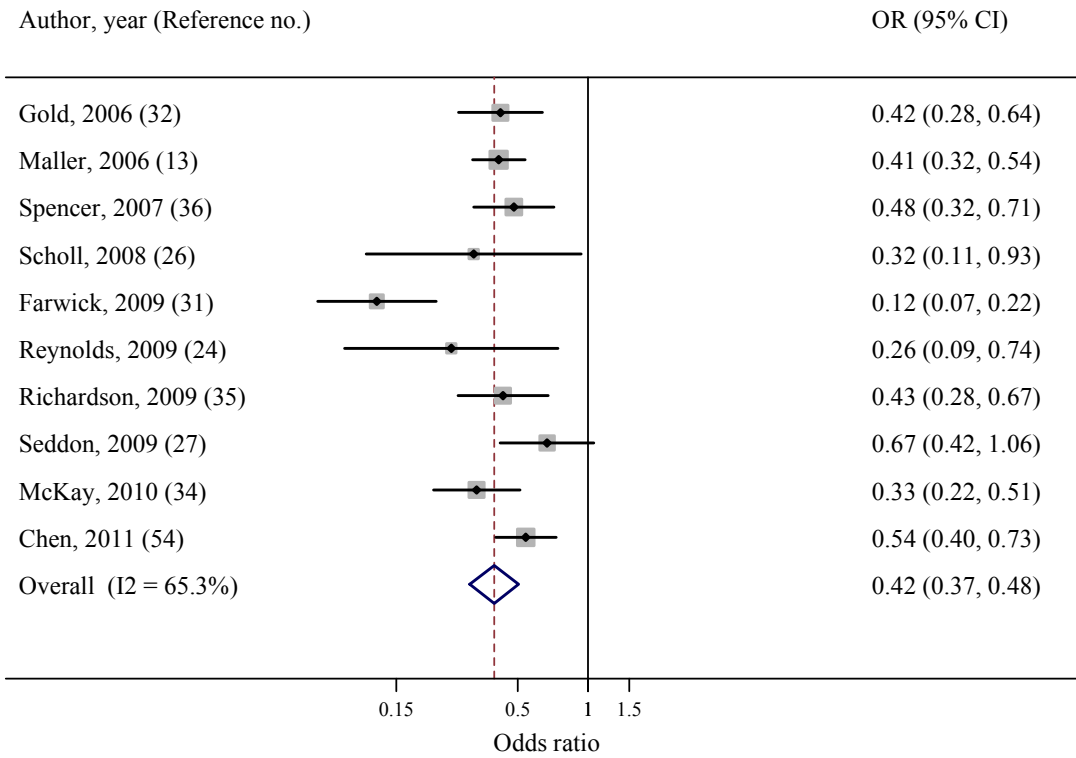

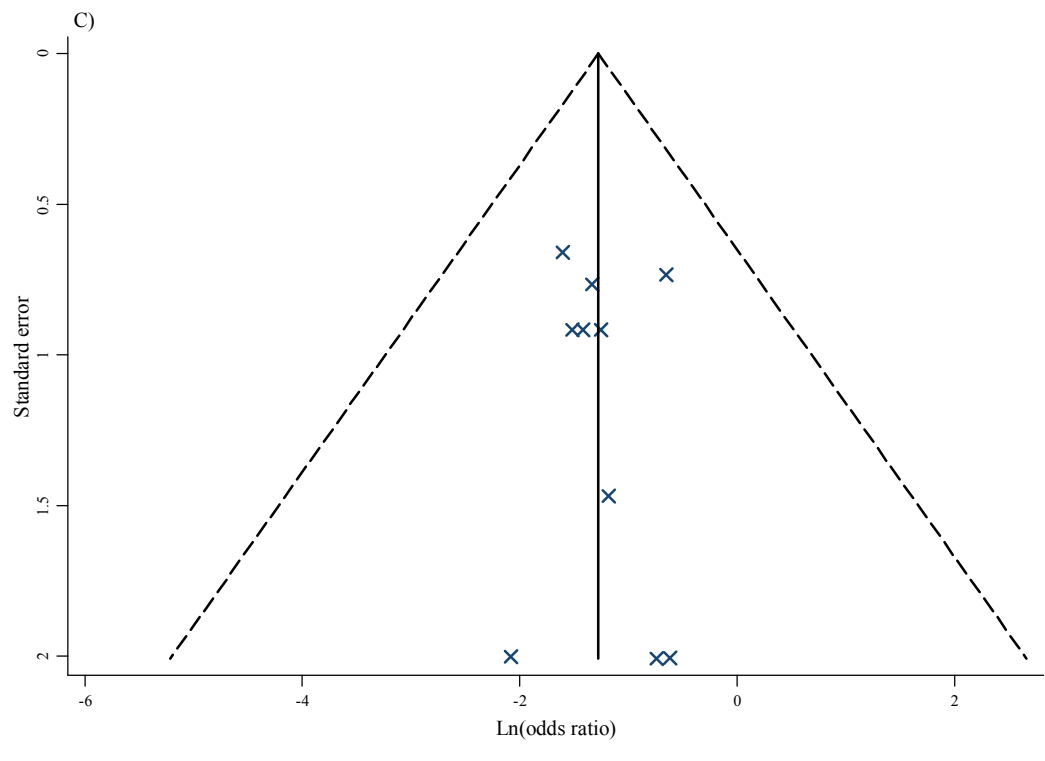

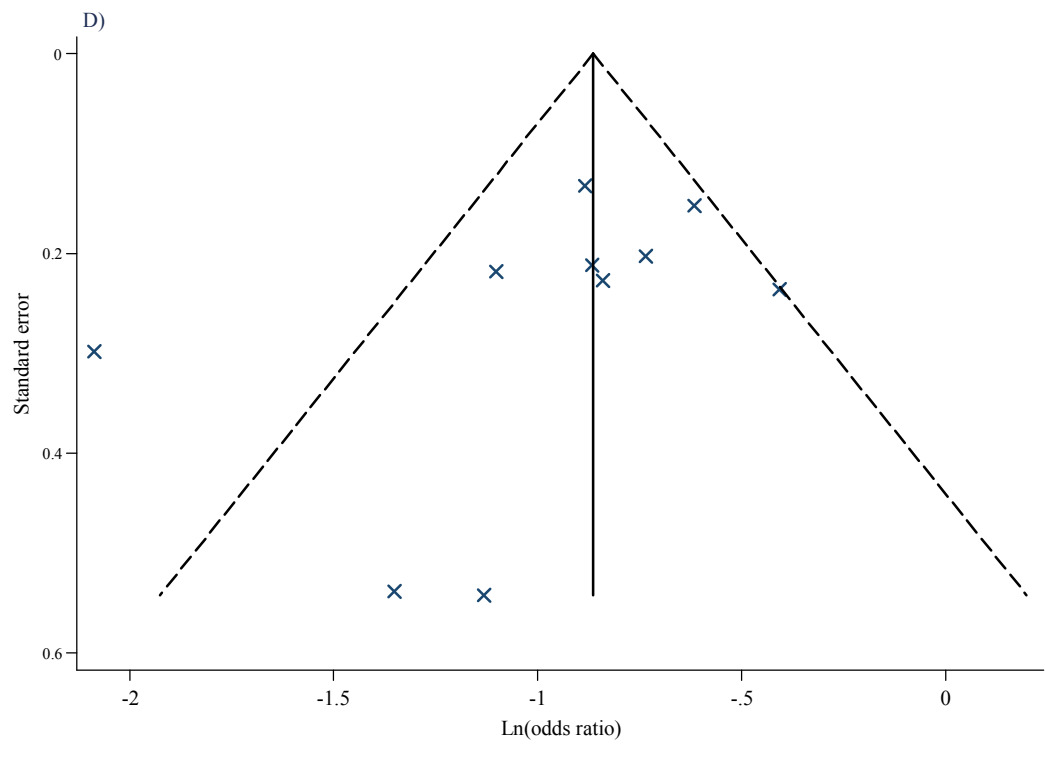

Supplement: kws031-kws031_web_material.pdf [file kws031-kws031_web_material.pdf]
